## 1 **Structured Ethical Review for Wastewater-Based Testing**

2 Devin A. Bowes<sup>1,2\*</sup>; Amanda Darling<sup>3\*</sup>; Erin M.Driver<sup>1\*</sup>; Devrim Kaya<sup>4,5\*</sup>; Rasha Maal-Bared<sup>6</sup>;  
3 Lisa M. Lee<sup>7</sup>; Kenneth Goodman<sup>8</sup>; Sangeet Adhikari<sup>1</sup>; Srijan Aggarwal<sup>9</sup>; Aaron Bivins<sup>10</sup>; Zuzana  
4 Bohrerova<sup>11</sup>; Alasdair Cohen<sup>3,12</sup>; Claire Duvallet<sup>13</sup>; Rasha A. Elnimeiry<sup>14</sup>; Justin M. Hutchison<sup>15</sup>;  
5 Vikram Kapoor<sup>16</sup>; Ishi Keenum<sup>17</sup>; Fangqiong Ling<sup>18</sup>; Deborah Sills<sup>19</sup>; Ananda Tiwari<sup>20,21</sup>; Peter  
6 Vikesland<sup>3</sup>; Ryan Ziels<sup>22</sup>; Cresten Mansfeldt<sup>23,24†</sup>

7

8 \*These authors contributed equally to this work

9 †Corresponding author: [cresten.mansfeldt@colorado.edu](mailto:cresten.mansfeldt@colorado.edu)

10

- 11 1. Biodesign Center for Environmental Health Engineering, The Biodesign Institute, Arizona State University,  
12 1001 S. McAllister Ave, Tempe, AZ, 85287
- 13 2. Center on Forced Displacement, Boston University, 111 Cummington Mall, Boston, MA, 02215
- 14 3. Department of Civil and Environmental Engineering, Virginia Tech, 1145 Perry Street; 415 Durham Hall;  
15 Blacksburg, VA 24061
- 16 4. School of Chemical, Biological, and Environmental Engineering, Oregon State University, 105 26th St,  
17 Corvallis, Oregon 97331
- 18 5. School of Public Health, San Diego State University, San Diego and Imperial Valley, CA
- 19 6. Quality Assurance and Environment, EPCOR Water Services Inc., EPCOR Tower, 2000–10423 101 Street  
20 NW, Edmonton, Alberta, CA
- 21 7. Department of Population Health Sciences and Division of Scholarly Integrity and Research Compliance,  
22 Virginia Tech, 300 Turner St. NW, Suite 4120 (0497), Blacksburg, VA 24061
- 23 8. Institute for Bioethics and Health Policy, Miller School of Medicine, University of Miami, Miami, Florida
- 24 9. Department of Civil, Geological, and Environmental Engineering, University of Alaska Fairbanks, 1764  
25 Tanana Loop, Fairbanks, AK 99775
- 26 10. Department of Civil & Environmental Engineering, Louisiana State University, 3255 Patrick F. Taylor Hall,  
27 Baton Rouge, LA 70803
- 28 11. The Ohio State University, Department of Civil, Environmental and Geodetic Engineering, 2070 Neil  
29 Avenue, 470 Hitchcock Hall, Columbus, OH 43210
- 30 12. Department of Population Health Sciences, Virginia Tech, 205 Duck Pond Drive, Blacksburg, VA 24061
- 31 13. Biobot Analytics, Inc., 501 Massachusetts Avenue; Cambridge, MA; 02139
- 32 14. Public Health Outbreak Coordination, Informatics, Surveillance (PHOCIS) Office – Surveillance Section,  
33 Division of Disease Control and Health Statistics, Washington State Department of Health, 111 Israel Rd  
34 SE, Tumwater, WA 98501
- 35 15. Department of Civil, Environmental, and Architectural Engineering, University of Kansas, 1530 W 15th St,  
36 Lawrence, KS 66045
- 37 16. School of Civil & Environmental Engineering, and Construction Management, University of Texas at San  
38 Antonio, 1 UTSA Circle, San Antonio, TX 78249
- 39 17. Complex Microbial Systems Group, National Institute of Standards and Technology, 100 Bureau Dr,  
40 Gaithersburg, MD 20899
- 41 18. Department of Energy, Environmental and Chemical Engineering, Washington University in St. Louis, One  
42 Brookings Drive, St. Louis, MO, 63130
- 43 19. Department of Civil and Environmental Engineering, Bucknell University, Lewisburg, PA, 17837
- 44 20. Department of Food Hygiene and Environmental Health, Faculty of Veterinary Medicine, University of  
45 Helsinki, Agnes Sjöberginkatu 2 P.O. Box 66 FI 00014 Helsinki, Finland
- 46 21. Expert Microbiology Unit, Finnish Institute for Health and Welfare, Kuopio, Finland

- 47 22. Department of Civil Engineering, the University of British Columbia, 6250 Applied Science Ln #2002,  
48 Vancouver, BC V6T 1Z4  
49 23. Department of Civil, Environmental, and Architectural Engineering, University of Colorado Boulder, UCB  
50 428, Boulder, CO 80309  
51 24. Environmental Engineering Program, University of Colorado Boulder, UCB 607, Boulder, CO 80309  
52

53 **Keywords:** Wastewater-based epidemiology, building-scale, sub-sewershed, ethics, structured  
54 review, SARS-CoV-2

55 =====

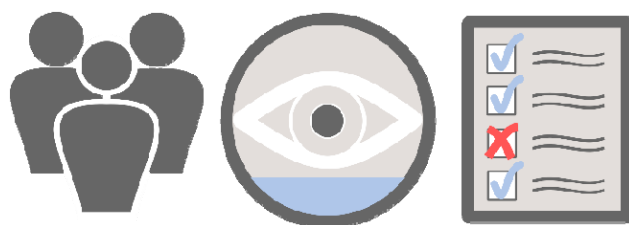

56  
57 **Abstract.** Wastewater-based testing (WBT) for SARS-CoV-2 has rapidly expanded over the  
58 past three years due to its ability to provide a comprehensive measurement of disease  
59 prevalence independent of clinical testing. The development and simultaneous application of the  
60 field blurred the boundary between measuring biomarkers for research activities and for pursuit  
61 of public health goals, both areas with well-established ethical frameworks. Currently, WBT  
62 practitioners do not employ a standardized ethical review process (or associated data  
63 management safeguards), introducing the potential for adverse outcomes for WBT  
64 professionals and community members. To address this deficiency, an interdisciplinary group  
65 developed a framework for a structured ethical review of WBT. The workshop employed a  
66 consensus approach to create this framework as a set of 11-questions derived from primarily  
67 public health guidance because of the common exemption of wastewater samples to human  
68 subject research considerations. This study retrospectively applied the set of questions to peer-  
69 reviewed published reports on SARS-CoV-2 monitoring campaigns covering the emergent  
70 phase of the pandemic from March 2020 to February 2022 (n=53). Overall, 43% of the  
71 responses to the questions were unable to be assessed because of lack of reported information.

72 It is therefore hypothesized that a systematic framework would at a minimum improve the  
73 communication of key ethical considerations for the application of WBT. Consistent application  
74 of a standardized ethical review will also assist in developing an engaged practice of critically  
75 applying and updating approaches and techniques to reflect the concerns held by both those  
76 practicing and being monitored by WBT supported campaigns.

77

78 **Synopsis.** Development of a structured ethical review facilitates retrospective analysis of  
79 published studies and drafted scenarios in the context of wastewater-based testing.

80

81 **Introduction: *The Need for a Structured Ethical Review.*** Wastewater-based testing (WBT)  
82 describes the sampling of wastewater to support initiatives such as public health, scientific  
83 research, law enforcement, and corporate surveillance. This flexibility of WBT originates from  
84 the ability to collect wastewater samples in near real-time, at the population-level, and for a  
85 variety of analytical targets, including pathogens that cause infectious diseases. Discussing the  
86 technique of WBT often progresses rapidly to describing an application rather than exploring the  
87 concept in application-free terms<sup>1</sup>. For example, WBT has been used successfully to monitor  
88 enteric and respiratory pathogens, such as poliovirus and coronaviruses<sup>2,3</sup>. Integrating WBT into  
89 public health surveillance is potentially less invasive, more efficient, and more inclusive than  
90 clinical testing. Inclusivity is an inherent property of the aggregated nature of wastewater, which  
91 contains target infection bioindicators (e.g., viral RNA) excreted by community members into a  
92 municipal sewer network and can capture symptomatic, asymptomatic, and pre-symptomatic  
93 carriers of infectious pathogens regardless of an individual's access to healthcare<sup>4</sup>. WBT can  
94 also provide an early warning of pathogen presence within a given community, as well as detect  
95 and track circulating and novel genomic variants (e.g., for SARS-CoV-2)<sup>5-7</sup>. As such, the use of

96 WBT presents as a reliable, cost-effective, objective, and rapid public health tool that  
97 complements clinical testing methods that are increasingly being adopted<sup>8,9</sup>.

98  
99 This application-specific consideration of WBT may too easily borrow the well-established  
100 public health ethical and legal frameworks to the analysis of a flexible tool. For example,  
101 academic researchers who used WBT to monitor pathogens were exempt from, or did not seek,  
102 standardized research ethics oversight or review because of the composite nature of the  
103 collected wastewater<sup>10,11</sup>. Whereas public health departments rapidly incorporated wastewater  
104 sampling into the surveillance of SARS-CoV-2<sup>12-14</sup>, WBT additionally supported the research  
105 activities of academics and services offered by commercial biotechnology firms. This  
106 constellation of state, private, and academic entities is common within the operation and  
107 development of public health surveillance, with all entities performing clinical sampling.  
108 However, not all sampling translates into surveillance in support of public health, and each entity  
109 has separate legal and ethical frameworks<sup>15</sup>. Therefore, even when considering the ethics of a  
110 specific application of the tool, it is important to distinguish between WBT used for public health  
111 surveillance, which follows well-established professional practice and WHO guidelines<sup>16</sup>, and  
112 with WBT used for non-public health purposes (e.g., scientific research, law enforcement) or by  
113 non-public health entities (e.g., private entities)<sup>17</sup>. This distinction between testing and  
114 surveillance supports the usage of WBT throughout the text rather than the more often reported  
115 wastewater-based surveillance (WBS). “Surveillance” is a term of art, and in the context of  
116 public health, describes a method of learning about health, which is different from research or  
117 other applications of WBT. “Testing” is the technology or tool that can be used for a number of  
118 processes, including research, public health surveillance, or other types of monitoring.

119

120 When considering WBT in a more application-free context, concerns arise around data  
121 utilization and civic governance<sup>1,15</sup>. Whether WBT is used for research, private monitoring, or  
122 public health surveillance, overarching ethical questions have yet to be fully explored. WBT  
123 might negatively affect privacy expectations and civil liberties at the community or even  
124 individual level<sup>18-20</sup>. Cases in which wastewater-derived results prompt a targeted response in a  
125 specific community could stigmatize or might, in principle, violate the privacy of the sampled  
126 community, deflating the unique feature of conducting WBT; anonymity<sup>21,22</sup>. Conversely, the  
127 population at-large has a right to benefit from publicly-funded advanced surveillance  
128 technologies and the right to information about particular outbreaks so that individuals can make  
129 informed decisions about their health<sup>15</sup>, which ultimately requires broad and transparent  
130 communication of WBT results<sup>23</sup>. Generally, the usage of WBT to monitor for diseases, toxins,  
131 and terrorists threats receive broad public support across the United States<sup>24</sup>. Accordingly,  
132 special attention should be paid to contextualize WBT in terms of culture and community values,  
133 the intended result of the testing efforts, and the individuals connected to the sewer conveyance  
134 network, such that results can be communicated quickly, effectively, equitably, and ethically to  
135 maintain community buy-in<sup>25,26</sup>. A similar point is made by those who advocate for community-  
136 based participatory research whenever academic or government investigators seek to learn  
137 more about groups of people in a particular or specific region or place. Notably, with specific  
138 sampling place primarily occurring in fixed, publicly-owned or operated infrastructure, unique  
139 considerations arise in comparison to other public health measures surrounding the civic  
140 governance of WBT, necessitating development of a comprehensive framework that captures  
141 this multi-profession collaboration<sup>15</sup>.

142

143           An ethical framework applied to WBT might limit challenges that arise in contexts  
144 characterized by persistent injustice or violations of human rights. In addition, clearly defined  
145 ethical practices and processes can reduce or prevent community harm from and resistance to  
146 WBT when used for public health surveillance or scientific research purposes. The importance  
147 of clear ethical guidelines was recognized by the WHO's general framework for ethical public  
148 health surveillance systems<sup>16</sup>. Thus, WBT practitioners, which include a mix of scientific experts  
149 from highly diverse disciplines and public health authorities, are increasingly called to translate  
150 this general framework into practice<sup>27</sup>, to both protect the public and ensure a high level of  
151 support from the community with broad social acceptance and trust<sup>28-30</sup>. However, as  
152 demonstrated by lack of independent review and oversight of WBT for SARS-CoV-2 monitoring,  
153 translating these guidelines into professional practice remains unstandardized and in an early  
154 phase of adoption due to those initially conducting WBT having expertise and training outside of  
155 public health practice. Additionally, as WBT continues to expand into further applications that  
156 transcend multiple disciplines<sup>23</sup>, such as opioid detection, monitoring campaigns should be  
157 reassessed for each new application, community, and location<sup>31</sup>. Therefore, interpreting the  
158 existing public health frameworks set forth by the WHO and others<sup>15,30,32-34</sup> and translating them  
159 into a concrete, actionable, and specific framework of questions, can assist wastewater  
160 practitioners, public health officials, policy makers, utilities, and the public in interpreting the  
161 suitability of WBT.

162

163           This question-oriented framework can also encourage new entities engaging in the field  
164 to rapidly adopt best practices and can provide the tools to identify those applications that fail to  
165 align. Critically, the framework is provided as a set of questions to interrogate an application, not  
166 a set of finalized guidelines. This framework identifies concerns concretely and rapidly to enable

167 interdisciplinary teams to engage well-established professional practices in collaboration.  
168 Additionally, this framework highlights areas that require further review rather than providing a  
169 strict protocol given that ethical issues are often easily raised, yet require contextualized  
170 analysis and continued engagement by all involved to address successfully. Finally, this  
171 standardized set of questions might also promote an ethical research culture, if adopted and  
172 upheld as an ongoing practice, and support the reputation and trust of the research field,  
173 ensuring equitable and sustainable foundations for WBT systems and community  
174 engagement<sup>35</sup>. For these reasons, we present a structured ethical review framework designed  
175 as a worksheet to assist in ensuring the successful, long-term, and wide-ranging implementation  
176 of WBT.

177

178 **Methods: *Design of a Structured Ethical Review.*** Participants contributing to the  
179 development of the structured ethical review were recruited through a public announcement at  
180 the Water Environment Federation's Public Health and Water Conference & Wastewater  
181 Disease Surveillance Summit on March 23, 2022, as well as active social media  
182 announcements and word-of-mouth referrals. From this effort, 29 active participants were  
183 involved in the formulation of this study. Participants included representatives from a range of  
184 WBT activities, including academic researchers, public health and wastewater practitioners, and  
185 private entities working in WBT. The workshops drew upon two previously published articles  
186 describing ethical considerations of surveillance to develop the framework for a structured  
187 ethical review of the existing COVID-19 WBT literature, with the concepts of structured reviews  
188 being well-established in the creation of Institutional Review Board (IRB) processes<sup>36</sup>. The first  
189 selected article, written by Gary Marx (1997), emphasizes what the author calls "the new  
190 surveillance"<sup>37</sup>. Marx (1997) poses 29 questions in three categories (the means, the data

191 collection context, and uses) to assess the ethics of surveillance, which the workshop then  
192 adapted to better suit WBT. The second article, by Hrudehy et al. (2021), explicitly focused on  
193 ethical guidelines through 17 questions applied to SARS-CoV-2 wastewater surveillance based  
194 on a comprehensive literature review and previous WHO recommendations<sup>32</sup>. Hrudehy et al.  
195 concluded the existing public health ethics literature fails to provide robust guidance for WBT  
196 practitioners.

197  
198 To apply and add to these previous works, the participants developed the structured  
199 ethical review framework using a workshop approach. Prior to the workshop, each participant  
200 reviewed these two articles on ethics of public health surveillance<sup>32,37</sup> and drafted concise  
201 descriptions for three levels of ethical sufficiency for each of the categories posed by Marx  
202 (1997) and Hrudehy et al. (2021) applied to WBT activities. The three levels of ethical sufficiency  
203 were as follows: 0 - minimal review required (no ethical concerns); 1 - review suggested (limited  
204 ethical concerns); and 2 - review strongly suggested (broad ethical concerns). These levels  
205 were selected to prioritize ethical reviews and communication efforts of those designing and  
206 operating surveillance programs. Thereafter, each participant independently filled their brief  
207 written descriptions within a shared document for each previously identified category of ethical  
208 consideration identified in the two articles. During the virtual workshop, participants reviewed the  
209 responses and identified the guidelines and questions that warranted further discussion; the  
210 output thus identified consensus descriptions of ethical sufficiency rankings. After the workshop,  
211 each participant adopted a category and prepared a final draft description for the three levels of  
212 ethical sufficiency into a table (Supplemental Table 1). All co-authors then reviewed the table,  
213 and revisions were made until a consensus final draft was reached, with duplicate categories  
214 merged, but all others preserved from Marx (1997) and Hrudehy et al. (2021). The final, fully



215 consolidated framework comprises 37 categories of ethical consideration for WBT, with three  
216 ordinal ranking descriptions within each category (Supplemental Table 1). These categories  
217 broadly represent key considerations in community engagement, equality, establishment of a  
218 new precedent, and data integrity. With the large size of the framework, the set was further  
219 refined, with the participants being asked to list ten essential questions to include. In total, 16  
220 participants provided a score, and those categories receiving over 9 votes or higher were  
221 included in the final framework (Table 1). In essence, the developed structured ethical review  
222 provides a set of questions that enables users to provide a score (higher the score the greater  
223 the ethical concern) when considering a WBT application.

224

225 ***Inclusion Criteria for Published Studies Considered within the Application of the***

226 ***Structured Ethical Review.*** The initial collection of studies was obtained by searching for  
227 articles containing the keyword phrases "SARS-CoV-2" and "wastewater," yielding a total of  
228 5,632 articles as of February 2022. To focus on sampling strategies that potentially challenge  
229 individuals' assumptions of privacy, further filtering was performed to include studies reporting  
230 on near-building and/or within-sewer monitoring. This involved incorporating additional modifiers  
231 such as "campus," "nursing home not campus," "prison not campus," "hospital and wastewater-  
232 based and building not campus," and "neighborhood not campus." Consequently, the modified  
233 search categories returned 1204, 240, 119, 201, and 313 articles, respectively. Studies were  
234 excluded if they did not mention monitoring within a sewer collection system at the  
235 neighborhood or building-level scale or if they were not yet published as peer-reviewed articles.  
236 This strategy was used to narrow the database into a representative and manageable sub-  
237 selection of WBT related literature covering the early phase of the pandemic as a case study.  
238 The goal here was to emphasize the utility of the ethical framework applied to a coherent set of

239 WBT applications rather than defining the best practices for a given application. Therefore, this  
240 structured review approach could be applied in the future to private residential settings<sup>38</sup> or at  
241 wastewater treatment plant scales<sup>39</sup>, but both areas were excluded from current consideration.  
242 A note on private settings: If one accepts the utility of a robust ethics analysis to improve  
243 practice and foster trustworthiness, it should not matter if an educational institution, for instance,  
244 is public or private. The analysis of human biological material and data will always raise ethical  
245 issues, and it is unacceptable to suggest that private institutions ought adhere to different  
246 scientific or ethical standards.

247  
248 After applying these filters, 25 near-building and 21 within-sewer SARS-CoV-2 WBT studies  
249 were identified for review. The inclusion of 7 additional articles published after the initial search  
250 that were previously in preprint status increased the number of studies included in this  
251 structured ethical review to 53 (56 publications were represented by these studies, with 3 having  
252 two publications describing the same monitoring campaign and were considered in concert).  
253 While published research articles inherently connote research use of WBT, the selected articles  
254 had potential direct applications to public health, facilitating their use in the evaluation of the  
255 structured ethical review framework.

256  
257 Papers were divided across participants for review, with overlapping assignments provided.  
258 Overall, 79 reviews were completed by answering all 37 questions based on the reviewers'  
259 analysis of the presented text alone. Conflicting assignments were evaluated, but were left  
260 unchanged, resulting in an average score for those papers. The reviews were then consolidated  
261 into a summary data frame for broad comparisons between the responses to individual  
262 questions

**Table 1. Consolidated framework for a structured ethical review to assess potential adverse outcomes of WBT efforts.** Specific categories originated from either Marx 1997 [\*] or Hrudey et al., 2021 [†]. The top 11 categories based on the internal voting are presented here, the full framework is presented as Supplemental Table 1, available at DOI:10.17632/2xkfkcsxx8.1.

| <b>Category</b>                                                                                                                   | <b>0 - Minimal Review Required</b>                                                                                                                                                                                                                                                                                                                                      | <b>1 - Review Suggested</b>                                                                                                                                                                                                                                                                                                                                               | <b>2 - Review Strongly Suggested</b>                                                                                                                                                                                                                                                                                                                                    |
|-----------------------------------------------------------------------------------------------------------------------------------|-------------------------------------------------------------------------------------------------------------------------------------------------------------------------------------------------------------------------------------------------------------------------------------------------------------------------------------------------------------------------|---------------------------------------------------------------------------------------------------------------------------------------------------------------------------------------------------------------------------------------------------------------------------------------------------------------------------------------------------------------------------|-------------------------------------------------------------------------------------------------------------------------------------------------------------------------------------------------------------------------------------------------------------------------------------------------------------------------------------------------------------------------|
| <b>Legitimacy:</b> Are surveillance data collected only for a legitimate public health purpose?†                                  | Data support public health agents for public health measures                                                                                                                                                                                                                                                                                                            | Data support non-public health agents for public health measures                                                                                                                                                                                                                                                                                                          | Data support non-public health agents (or public health agents acting outside of public health) for non-public health purposes                                                                                                                                                                                                                                          |
| <b>Unfair Disadvantage:</b> Is the information used in such a way as to cause unwarranted harm or disadvantage to its subject?*   | WBT is implemented with clear scope, oversight, and decision-making procedures including procedures for response to wastewater data with policies for follow-up clinical testing applicable to full communities                                                                                                                                                         | Unintentionally subjecting specific areas to the possibility of a disruptive intervention (lockdowns, quarantines, isolations of entire areas without any process for identifying and isolating relevant individuals; mandatory testing of individuals in response to wastewater data) whereas excluding others from the same level of surveillance scrutiny and response | Intentionally subjecting specific areas to the possibility of a disruptive intervention (lockdowns, quarantines, isolations of entire areas without any process for identifying and isolating relevant individuals; mandatory testing of individuals in response to wastewater data) whereas excluding others from the same level of surveillance scrutiny and response |
| <b>Data Stewardship and Protection:</b> Is the data properly maintained to protect those monitored?*                              | Data managed per requirements of community monitored                                                                                                                                                                                                                                                                                                                    | Data managed per requirements of funding agency                                                                                                                                                                                                                                                                                                                           | Data management plan absent                                                                                                                                                                                                                                                                                                                                             |
| <b>Creation of Unwanted Precedents:</b> Is it likely to create precedents that will lead to its application in undesirable ways?* | Analysis for individual identification prohibited; explorations outside of agreed-upon community scope is explicitly prohibited                                                                                                                                                                                                                                         | No positional statement regarding individual identification; No discussion of future research is discussed                                                                                                                                                                                                                                                                | Explicitly for identification of individuals or otherwise unethical applications                                                                                                                                                                                                                                                                                        |
| <b>Awareness:</b> Are individuals informed they are being monitored and why?*                                                     | Representative(s) of the monitoring campaign are in a cycle of continued community outreach and engagement during WBT and over the clearly defined reporting period providing contextualization of the scope and intent to minimize misrepresentation or misuse; those monitoring capture the questions from the community rather than the wastewater utility operators | Duration, scope, and intent is communicated and disseminated in a passive manner without contextualization or engagement OR communicated to a single representative of the community; the wastewater utility operators respond to increased inquiries but have access to those collecting the data to direct inquiries                                                    | No direct communication of the duration, scope, and intent to the monitored community members; the burden of communication falls solely on the third-party wastewater utility operators rather than the data collectors                                                                                                                                                 |

|                                                                                                                                                                 |                                                                                                                                                                                                                                                                                                                                                                                                                                          |                                                                                                                                                                                                                                    |                                                                                                                                                                      |
|-----------------------------------------------------------------------------------------------------------------------------------------------------------------|------------------------------------------------------------------------------------------------------------------------------------------------------------------------------------------------------------------------------------------------------------------------------------------------------------------------------------------------------------------------------------------------------------------------------------------|------------------------------------------------------------------------------------------------------------------------------------------------------------------------------------------------------------------------------------|----------------------------------------------------------------------------------------------------------------------------------------------------------------------|
| <p><b>External Data Sharing:</b> Is the public health surveillance data shared with other public health agencies when addressing a public health need?†</p>     | <p>Collected WBT-supported public health data is shared freely with/between public health agencies when a public health need presents or persists</p>                                                                                                                                                                                                                                                                                    | <p>Collected WBT-supported public health data only partially shared with/between public health agencies when a public health need presents or persists</p>                                                                         | <p>No data is shared when a public health need presents or persists</p>                                                                                              |
| <p><b>Public Decision-Making:</b> Was the decision to use WBT in surveillance arrived at through some public discussion and decision-making process?*</p>       | <p>Surveillance program was designed in a public manner (e.g., review by elected officials and public through town halls for initial implementation and continued operation) with a good-faith effort to reach both those receptive or resistant to the objectives of public health</p>                                                                                                                                                  | <p>Program does not receive formal public authorization but is broadly supported by the public (as informed by representative public surveys)</p>                                                                                  | <p>Program does not receive formal public authorization and is not supported by the public (as informed by representative public surveys)</p>                        |
| <p><b>Right of Inspection:</b> Are people aware of the findings of WBT supported surveillance and how they were created?*</p>                                   | <p>Representative(s) of the monitoring campaign are in a cycle of continued community outreach and engagement during the sample collection and reporting period providing contextualization of the collected data to minimize misrepresentation or misuse (e.g., updating an annotated and agreed-upon internet-accessible dashboard; timely and routine public town-halls or open seminars; direct mailing to surveyed individuals)</p> | <p>The collected data is communicated and disseminated in a passive manner without contextualization or engagement OR communicated to a single representative of the community</p>                                                 | <p>No direct communication of the collected data to the monitored community members</p>                                                                              |
| <p><b>Equality-inequality:</b> Is WBT broadly applied to all or only those able to resist?*</p>                                                                 | <p>Entire community is monitored (e.g., treatment plant; jail sampling that monitors the effluent of the whole jail including staff and inmates)</p>                                                                                                                                                                                                                                                                                     | <p>Representative coverage is achieved (e.g., manhole sampling, but ensuring that demographics of surveilled communities are representative of the entire city; jail sampling that has sites for staff and inmates separately)</p> | <p>Only protected-class communities are monitored (e.g., manhole sampling that surveils only low-GDP per capita areas; jail sampling that only surveils inmates)</p> |
| <p><b>Community Values:</b> Are the values and concerns of the communities taken into account in planning, implementing, and using data from surveillance?†</p> | <p>Representative of the monitoring campaign are in a cycle of continued community outreach and engagement during the planning and implementing period to address the concerns and support the values of the community</p>                                                                                                                                                                                                               | <p>Representative of the monitoring campaign are engaged during the planning period only to address the concerns and support the values of the community</p>                                                                       | <p>No direct involvement of the monitored community members</p>                                                                                                      |
| <p><b>Consequence of Inaction:</b> What are the consequences of taking no surveillance action?*</p>                                                             | <p>Mortality, morbidity, or other adverse effects is imposed on community by lack of surveillance</p>                                                                                                                                                                                                                                                                                                                                    | <p>The surveillance data does not minimize adverse effects to the community</p>                                                                                                                                                    | <p>The community benefits by not being surveyed</p>                                                                                                                  |

266 **Results and Discussion:**

267 **Reconsidering SARS-CoV-2: Application of the structured ethical review.** The main  
268 goal of this study was to develop a framework to assist in identifying gaps in ethical  
269 considerations of WBT as a tool. This was accomplished by first developing and then  
270 demonstrating the framework by applying the structured ethical review framework to previously  
271 reported SARS-CoV-2 WBT studies (Figure 1). Application of the structured ethical review  
272 framework highlighted that throughout the published articles reviewed in this work, gaps in  
273 information were observed in both the manuscript and supplemental information (1247 of 2923  
274 answers provided (43%) indicated “Not Recorded in the Main Text”). This absence may be the  
275 result of the inclusion of studies predominantly reported by non-public health agents (e.g.,  
276 academics, researchers). For example, when compared to clinical research in which detailed  
277 informed consent (i.e., voluntariness, information disclosure, decision-making capacity, and  
278 communication of results) is required<sup>40</sup>, few WBT studies articulated whether consent was  
279 obtained from the studied community, whether those results were communicated back to the  
280 community, and/or whether those results were used with clear public health objectives and  
281 outcomes. It is important to note that WBT can be applied as a public health surveillance tool  
282 that would then operate within existing legal and regulatory frameworks. Within these specific  
283 applications, consent for the collection and testing of wastewater samples may not be required  
284 from individuals when a pooled sample is being analyzed, as this is considered to be part of  
285 routine public health surveillance<sup>41</sup>. However, there may be legal and ethical considerations  
286 around the use of the WBT data collected, for example, in research applications, and these  
287 should be addressed by relevant authorities and other frameworks. Broadly, the absence of  
288 reported information for evaluating community engagement and data safeguards reflects the  
289 current lack of a standardized ethical framework for WBT campaigns.

290  
291           This exemption from reporting and lack of oversight may also be due to a lack of clarity  
292 for the motivation of the WBT study. For example, these articles could have been originally  
293 motivated by a research interest with results that prompted a public health action. Conversely,  
294 authors may have retrospectively published results from a public health surveillance system. In  
295 the former case, authors may have assumed the research study was exempted from IRB  
296 approval given the composite nature of the sample, which is believed to prevent the ability to  
297 identify specific individuals in a given sewer catchment<sup>42</sup>. In certain cases, authors referenced  
298 IRB approvals for utilizing individual case data<sup>43</sup>, but in most cases, WBT sample data itself was  
299 determined to be exempt from IRB oversight. In select cases, ambiguity surrounded whether the  
300 IRBs themselves arrived at these determinations or the researchers, a key consideration given  
301 that these oversight bodies are responsible for conforming to federal regulations.

302  
303           However, the data collected from WBT were sometimes used for direct public health  
304 interventions, a usage of WBT that aligns with public health surveillance and that is distinct from  
305 research activities governed by IRB protocols. For example, other studies (mainly dormitory and  
306 hospital surveys) reported on positive SARS-CoV-2 detection in wastewater, triggering  
307 mandatory clinical or individualized testing from which infected individuals were identified<sup>43-46</sup>.  
308 In contrast, WBT of a cargo ship specifically explored border protection against infected  
309 seafarers as a potential public health intervention<sup>47</sup>, a more intervention-driven approach than  
310 that described as a complementary monitoring tool for airplanes<sup>48</sup>. Ultimately, the study did not  
311 support WBT in the cargo ship application, notably because individualized testing was already  
312 deployed. This highlights a key finding: the motivation for the use of WBT during the early phase  
313 of the pandemic was blurred between research and public health surveillance.

314 This dual nature of early monitoring campaigns complicates their interpretation. For  
315 example, if WBT was conducted as part of a public health surveillance effort, informing  
316 subsequent action where individuals were identified through individualized testing regimes (e.g.,  
317 isolation), then IRB oversight would be unnecessary as this use of WBT would fall under ethical  
318 guidelines for public health surveillance. This determination that IRB is not required rests on  
319 WBT being used as a tool for public health surveillance conducted by a public health authority,  
320 which is explicitly excluded from the US IRB regulations (Subpart A of 45 CFR Part 46)<sup>49</sup>.  
321 However, if the wastewater data itself triggered direct public health outcomes without  
322 subsequent independent surveillance, such as clinical testing confirmation during the early  
323 phase of the pandemic, or if the subsequent clinical testing had the additional goal to produce  
324 generalizable knowledge, then IRB oversight is likely needed because both of these areas  
325 include research components during the development phase. This requirement results from  
326 either using non-clinical data, that at the time was relatively new to the public health field, for a  
327 direct health intervention; or using clinical data for a research purpose rather than public health  
328 surveillance (see Categories 4, 10, & 28 in Supplemental Table 1). Notably, none of the 53  
329 studies reviewed with the proposed structured ethical review were flagged by their institutions  
330 for IRB approval for the WBT portion alone, suggesting that IRB approval may have been  
331 granted to other types of ongoing research such as individualized saliva testing when needed  
332 and used in combination with these programs. In compliance with the IRB regulations, studies  
333 that pair WBT with public health surveillance should seek IRB review to address the research  
334 aspects of the work.

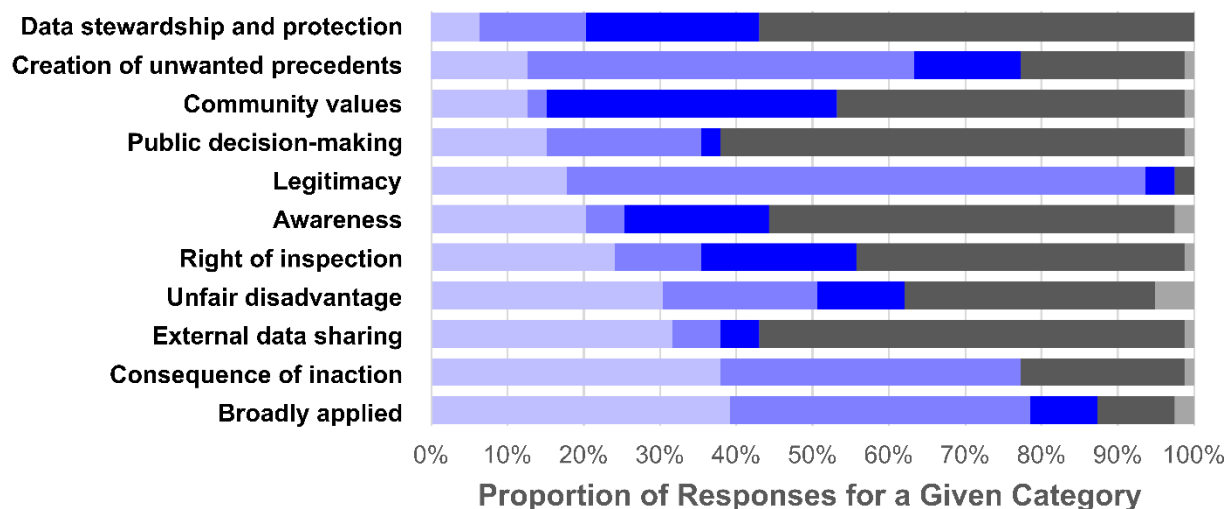

335 ■ Minimal Review Required ■ Review Suggested ■ Review Strongly Suggested ■ Not Available in the Main Text ■ Not Applicable

336 **Figure 1.** The distribution of assigned flags (“minimal review required”, “review suggested”, “review  
 337 strongly suggested”, “not available in the main text”, “not applicable”) for the top 11 categories in the  
 338 structured ethical review, represented as a fraction percent of all publications analyzed (n=53) with  
 339 multiple reviewers providing reports for select individual studies, resulting in more reviews than studies  
 340 (n=79)<sup>12,42–46,50–99</sup>. In total, 56 publications were represented by these studies, with 3 having two  
 341 publications describing the same monitoring campaign and were considered in concert. The categories  
 342 are sorted by ascending proportion of “minimal review required”.

343  
 344 In contrast to the ambiguity surrounding IRB review reporting, the WBT community has  
 345 already taken to reporting on other ethical areas including the scale of testing (e.g., wastewater  
 346 treatment plants [WWTPs], building-level), the identifiability of populations represented, the  
 347 presence/absence of validated QA/QC workflows, and the need for clear statements of goals  
 348 supporting public health. However, gaps in presenting ethical considerations were found with  
 349 respect to stakeholder participation in the development and deployment of WBT efforts as well  
 350 as data and sample management. Only 5 of 53 studies clearly identified a data management  
 351 plan, with no study combining an additional communication or engagement plan. Elements that  
 352 were considered when screening for a communication or engagement plan included statements



353 surrounding how or whether the public or public representatives were engaged in the  
354 development, deployment, or future applications of WBT; the surveilled parties knew their rights  
355 or were given the right to challenge, express grievances, or seek redress; and if the potential  
356 risks and/or benefits were outlined in detail to these populations or third parties. It is possible  
357 that some studies developed communication and engagement plans that were not explicitly  
358 reported in the published research, and we acknowledge this limitation in our review. Further,  
359 wastewater data security, handling, and subsequent use in and outside the scope of the project  
360 (including the fate of remaining samples) were largely neither acknowledged nor discussed.  
361 Details on data ownership, security, management plans, and dissemination were generally  
362 absent, but key elements were provided in select studies<sup>44,51,82,96,98</sup>. Several elements that  
363 require more explicit elaboration include how data were reported during the operation of the  
364 campaign, by what mechanism, at what frequency (weekly, bi-weekly, etc.), and how thresholds  
365 of concern were established in terms of viral titers.

366  
367 In the case of campus- or dormitory-wide testing at colleges and universities, authors  
368 provided more information for these programs when compared to studies for large sewersheds,  
369 for instance at the level of a WWTP. Specifically, these studies detailed follow-up procedures for  
370 wastewater samples that resulted in positive detection of the virus (e.g., lockdowns, contact  
371 tracing), stakeholder engagement, and data dissemination plans. Likely, this higher level of  
372 detail resulted from building-level monitoring programs intentionally designed to use WBT to  
373 assist clinical testing and quarantine procedures. However, of all papers reviewed, only a few  
374 noted a process for obtaining consent from the studied populations<sup>45,50,63,78,80,84,90,99</sup>.

375  
376 **Learning from SARS-CoV-2: Sustaining Future Applications of WBS.** The structured ethical  
377 review aims to provide a framework to assess new areas or targets of monitoring and to

378 document evolving ethical applications of WBT when uniting technical innovation, community  
379 engagement, and professional collaboration<sup>100</sup>. For instance, the unique characteristics of an  
380 orthopoxvirus outbreak, which differs in transmission classification and carries higher pre-  
381 existing stigma, present additional ethical considerations within WBT<sup>101</sup>. Future applications will  
382 present new and unique challenges to the ethical application of WBT as a tool, promoting a  
383 continuous evaluation of the structured ethical review adopted here. Therefore, establishing,  
384 applying, and updating this structured ethical review over time will result in a transparent record  
385 of our understanding of the best ethical practices when applying WBT within and beyond public  
386 health surveillance.<sup>99</sup>

387  
388         Future WBT structured ethical reviews may need to consider human-specific, rather than  
389 just pathogen-specific, target biomolecules. Early within the development of this structured  
390 ethical review, it was established that the purview of recovering human genetic material was not  
391 the main focus of this tool given that considerations for targeted human monitoring are already  
392 developed in the biomedical research community and remain a bioethics concern beyond that of  
393 WBT<sup>102</sup>. However, with the technical capabilities of WBT advancing, the application of next-  
394 generation sequencing tools to collect personally identifiable health information opens unique  
395 and potentially community-desired possibilities<sup>103</sup>. Although relatively few papers used  
396 sequencing techniques and, when applied, were exercised only for detecting variants of SARS-  
397 CoV-2 in which human-specific DNA is masked from publicly-posted samples, there is an  
398 evident lack of guidelines when analyzing complete genetic data recovered from wastewater<sup>18</sup>.  
399 Notably, previous applications successfully applied more targeted approaches to screen for  
400 human mitochondrial sequences within wastewater as a population biomarker highlighting  
401 outside of sequencing technologies<sup>104</sup>. This necessitates a better understanding of the views  
402 and tolerances of those conducting targeted human-DNA testing, those using the data, and

403 persons whose samples are being tested<sup>105</sup>, potentially informing the evolution and revision of  
404 the categories within the structured ethical review.

405  
406           Importantly, this framework does not define which applications of WBT are ethically  
407 appropriate and which are not; it is simply a tool to guide the development and evolution of WBT  
408 campaigns by highlighting aspects which may require additional ethical review. In an ideal  
409 world, all WBT campaigns would receive ratings of "minimal review required" for all categories,  
410 but in practice this will almost certainly never be the case. Applying WBT requires trade-offs to  
411 maximize benefit and minimize harms. For example, waiting to implement WBT for a novel  
412 pathogen until all ethical concerns are fully resolved may hinder progress in public health  
413 surveillance to identify new outbreaks and intervene in their early stages. Different categories  
414 within the framework can also be in tension with one another, which is common for large  
415 frameworks and, thus, is expected. Additionally, the interpretation of each category will change  
416 accordingly as sampling campaigns are run by or analyzed through the viewpoint of  
417 researchers, governmental public health agencies, or private entities.

418  
419           The role and utility of ethics analysis in public health, research, and clinical practice is  
420 rarely to give approvals or disapprovals of inherently challenging issues and conflicts. It is,  
421 rather, to inform an already complex environment or problem by making clear salient values –  
422 some of which might be in conflict – and help practitioners weigh and apply these values. How,  
423 for instance, ought scientists balance a duty to protect privacy with an equally compelling right  
424 to benefit from science? The challenge is lensed when reasonable people disagree about an  
425 appropriate course of action. In such cases, the existence of an objective and transparent ethics  
426 process can guide both investigators and communities such that whatever action is decided,

427 there will be a mutual understanding of the cause. It is our view and recommendation that WBT  
428 and the communities it serves will improve with the adoption of structured ethics reviews.

429  
430 As WBT expands and new practitioners and researchers enter the field, this structured ethical  
431 review framework will provide education and guidance to promote best practices<sup>106</sup>. Given the  
432 length of the full, structured ethical review in terms of the number of categories, further  
433 development surrounding the ease-of-use is required to ensure wide-scale adoption of the  
434 structured ethical review framework by the WBT community. This adaptive, iterative approach to  
435 improving the framework is critical for managing this technology in the future, to safeguard the  
436 well-being of those under surveillance, and communicate robust ethical guidelines to protect the  
437 intended applications. Therefore, we strongly recommend the implementation of the structured  
438 ethical review by all those involved in both ongoing and future WBT campaigns to promote  
439 activities supporting ethical best practices.

440  
441 **Acknowledgements:** We thank Dr. Kyle Bibby (University of Notre Dame), Dr. Steve Hrudehy  
442 (University of Alberta), William Johnson (University of Colorado Boulder), Dr. Todd Schenk  
443 (Virginia Tech), Dr. Scott Meschke (University of Washington), Dr. Scott Olesen (Biobot  
444 Analytics), and Dr. Rachel Poretzky (University of Illinois Chicago) for their participation in the  
445 workshops. We also thank Dr. Stefan Wuertz (University of California Davis) for feedback on an  
446 initial outline of this work. This work was supported in part by the National Institute of General  
447 Medical Sciences (NIGMS) under award numbers P20GM113117 for the participation of Justin  
448 Hutchison and by the National Science Foundation (NSF) under award number NSF 2047470  
449 for the participation of Fangqiong Ling.

450

451

452 REFERENCES:

- 453 (1) Doorn, N. Wastewater Research and Surveillance: An Ethical Exploration. *Environ. Sci.*  
454 *Water Res. Technol.* **2022**, 8 (11), 2431–2438. <https://doi.org/10.1039/D2EW00127F>.
- 455 (2) Ivanova, O. E.; Yarmolskaya, M. S.; Ereemeeva, T. P.; Babkina, G. M.; Baykova, O. Y.;  
456 Akhmadishina, L. V.; Krasota, A. Y.; Kozlovskaya, L. I.; Lukashev, A. N. Environmental  
457 Surveillance for Poliovirus and Other Enteroviruses: Long-Term Experience in Moscow,  
458 Russian Federation, 2004–2017. *Viruses* **2019**, 11 (5), 424.  
459 <https://doi.org/10.3390/v11050424>.
- 460 (3) Más Lago, P.; Gary, H. E.; Pérez, L. S.; Cáceres, V.; Olivera, J. B.; Puentes, R. P.;  
461 Corredor, M. B.; Jiménez, P.; Pallansch, M. A.; Cruz, R. G. Poliovirus Detection in  
462 Wastewater and Stools Following an Immunization Campaign in Havana, Cuba. *Int. J.*  
463 *Epidemiol.* **2003**, 32 (5), 772–777. <https://doi.org/10.1093/ije/dyg185>.
- 464 (4) Chavarria-Miró, G.; Anfruns-Estrada, E.; Martínez-Velázquez, A.; Vázquez-Portero, M.;  
465 Guix, S.; Paraira, M.; Galofré, B.; Sánchez, G.; Pintó, R. M.; Bosch, A. Time Evolution of  
466 Severe Acute Respiratory Syndrome Coronavirus 2 (SARS-CoV-2) in Wastewater during  
467 the First Pandemic Wave of COVID-19 in the Metropolitan Area of Barcelona, Spain.  
468 *Appl. Environ. Microbiol.* **2021**, 87 (7), e02750-20. <https://doi.org/10.1128/AEM.02750-20>.
- 469 (5) Crits-Christoph, A.; Kantor, R. S.; Olm, M. R.; Whitney, O. N.; Al-Shayeb, B.; Lou, Y. C.;  
470 Flamholz, A.; Kennedy, L. C.; Greenwald, H.; Hinkle, A.; Hetzel, J.; Spitzer, S.; Koble, J.;  
471 Tan, A.; Hyde, F.; Schroth, G.; Kuersten, S.; Banfield, J. F.; Nelson, K. L. Genome  
472 Sequencing of Sewage Detects Regionally Prevalent SARS-CoV-2 Variants. *mBio* **2021**,  
473 12 (1), e02703-20. <https://doi.org/10.1128/mBio.02703-20>.
- 474 (6) Lin, X.; Glier, M.; Kuchinski, K.; Ross-Van Mierlo, T.; McVea, D.; Tyson, J. R.;  
475 Prystajeky, N.; Ziels, R. M. Assessing Multiplex Tiling PCR Sequencing Approaches for  
476 Detecting Genomic Variants of SARS-CoV-2 in Municipal Wastewater. *mSystems* **2021**, 6  
477 (5), e01068-21. <https://doi.org/10.1128/mSystems.01068-21>.
- 478 (7) Sutton, M.; Radniecki, T. S.; Kaya, D.; Alegre, D.; Geniza, M.; Girard, A.-M.; Carter, K.;  
479 Dasenko, M.; Sanders, J. L.; Cieslak, P. R.; Kelly, C.; Tyler, B. M. Detection of SARS-  
480 CoV-2 B.1.351 (Beta) Variant through Wastewater Surveillance before Case Detection in  
481 a Community, Oregon, USA. *Emerg. Infect. Dis.* **2022**, 28 (6), 1101–1109.  
482 <https://doi.org/10.3201/eid2806.211821>.
- 483 (8) Karthikeyan, S.; Ronquillo, N.; Belda-Ferre, P.; Alvarado, D.; Javidi, T.; Longhurst, C. A.;  
484 Knight, R. High-Throughput Wastewater SARS-CoV-2 Detection Enables Forecasting of  
485 Community Infection Dynamics in San Diego County. *mSystems* **2021**, 6 (2), e00045-21.  
486 <https://doi.org/10.1128/mSystems.00045-21>.
- 487 (9) Hart, O. E.; Halden, R. U. Computational Analysis of SARS-CoV-2/COVID-19  
488 Surveillance by Wastewater-Based Epidemiology Locally and Globally: Feasibility,  
489 Economy, Opportunities and Challenges. *Sci. Total Environ.* **2020**, 730, 138875.  
490 <https://doi.org/10.1016/j.scitotenv.2020.138875>.
- 491 (10) Wolfe, M. K. Invited Perspective: The Promise of Wastewater Monitoring for Infectious  
492 Disease Surveillance. *Environ. Health Perspect.* **2022**, 130 (5), 051302.  
493 <https://doi.org/10.1289/EHP11151>.
- 494 (11) Verovšek, T.; Krizman-Matasic, I.; Heath, D.; Heath, E. Site- and Event-Specific  
495 Wastewater-Based Epidemiology: Current Status and Future Perspectives. *Trends*  
496 *Environ. Anal. Chem.* **2020**, 28, e00105. <https://doi.org/10.1016/j.teac.2020.e00105>.
- 497 (12) Layton, B.; Kaya, D.; Kelly, C.; Williamson, K.; Bachhuber, S.; Banwarth, P.; Bethel, J.;  
498 Carter, K.; Dalziel, B.; Dasenko, M.; Geniza, M.; Gibbon, D.; Girard, A.-M.; Haggerty, R.;  
499 Higley, K.; Hynes, D.; Lubchenko, J.; McLaughlin, K.; Nieto, F. J.; Noakes, A.; Peterson,  
500 M.; Piemonti, A.; Sanders, J.; Tyler, B.; Radniecki, T. Wastewater-Based Epidemiology

- 501 Predicts COVID-19 Community Prevalence. *Res. Sq.* **2021**.  
502 <https://doi.org/10.21203/rs.3.rs-690031/v1>.
- 503 (13) McClary-Gutierrez, J. S.; Mattioli, M. C.; Marcenac, P.; Silverman, A. I.; Boehm, A. B.;  
504 Bibby, K.; Balliet, M.; de los Reyes, F. L.; Gerrity, D.; Griffith, J. F.; Holden, P. A.; Katehis,  
505 D.; Kester, G.; LaCross, N.; Lipp, E. K.; Meiman, J.; Noble, R. T.; Brossard, D.; McLellan,  
506 S. L. SARS-CoV-2 Wastewater Surveillance for Public Health Action. *Emerg. Infect. Dis.*  
507 **2021**, 27 (9), e210753. <https://doi.org/10.3201/eid2709.210753>.
- 508 (14) H. Holm, R.; Mukherjee, A.; P. Rai, J.; A. Yeager, R.; Talley, D.; N. Rai, S.; Bhatnagar, A.;  
509 Smith, T. SARS-CoV-2 RNA Abundance in Wastewater as a Function of Distinct Urban  
510 Sewershed Size. *Environ. Sci. Water Res. Technol.* **2022**, 8 (4), 807–819.  
511 <https://doi.org/10.1039/D1EW00672J>.
- 512 (15) Scassa, T.; Robinson, P.; Mosoff, R. The Datafication of Wastewater:: Legal, Ethical and  
513 Civic Considerations. *Technol. Regul.* **2022**, 2022, 23–35.  
514 <https://doi.org/10.26116/techreg.2022.003>.
- 515 (16) World Health Organization. *WHO Guidelines on Ethical Issues in Public Health*  
516 *Surveillance*; World Health Organization: Geneva, 2017.
- 517 (17) Wu, F.; Zhang, J.; Xiao, A.; Gu, X.; Lee, W. L.; Armas, F.; Kauffman, K.; Hanage, W.;  
518 Matus, M.; Ghaeli, N.; Endo, N.; Duvallet, C.; Poyet, M.; Moniz, K.; Washburne, A. D.;  
519 Erickson, T. B.; Chai, P. R.; Thompson, J.; Alm, E. J. SARS-CoV-2 Titers in Wastewater  
520 Are Higher than Expected from Clinically Confirmed Cases. *mSystems* **2020**, 5 (4),  
521 e00614-20. <https://doi.org/10.1128/mSystems.00614-20>.
- 522 (18) Jacobs, D.; McDaniel, T.; Varsani, A.; Halden, R. U.; Forrest, S.; Lee, H. Wastewater  
523 Monitoring Raises Privacy and Ethical Considerations. *IEEE Trans. Technol. Soc.* **2021**, 2  
524 (3), 116–121. <https://doi.org/10.1109/TTS.2021.3073886>.
- 525 (19) Gable, L.; Ram, N.; Ram, J. L. Legal and Ethical Implications of Wastewater Monitoring of  
526 SARS-CoV-2 for COVID-19 Surveillance. *J. Law Biosci.* **2020**, 7 (1), Isaa039.  
527 <https://doi.org/10.1093/jlb/Isaa039>.
- 528 (20) Hall, W.; Prichard, J.; Kirkbride, P.; Bruno, R.; Thai, P. K.; Gartner, C.; Lai, F. Y.; Ort, C.;  
529 Mueller, J. F. An Analysis of Ethical Issues in Using Wastewater Analysis to Monitor Illicit  
530 Drug Use. *Addiction* **2012**, 107 (10), 1767–1773. <https://doi.org/10.1111/j.1360-0443.2012.03887.x>.
- 531 (21) Sims, N.; Kasprzyk-Hordern, B. Future Perspectives of Wastewater-Based Epidemiology:  
532 Monitoring Infectious Disease Spread and Resistance to the Community Level. *Environ.*  
533 *Int.* **2020**, 139, 105689. <https://doi.org/10.1016/j.envint.2020.105689>.
- 534 (22) Shultz, J. M.; Cooper, J. L.; Baingana, F.; Oquendo, M. A.; Espinel, Z.; Althouse, B. M.;  
535 Marcelin, L. H.; Towers, S.; Espinola, M.; McCoy, C. B.; Mazurik, L.; Wainberg, M. L.;  
536 Neria, Y.; Rechkemmer, A. The Role of Fear-Related Behaviors in the 2013–2016 West  
537 Africa Ebola Virus Disease Outbreak. *Curr. Psychiatry Rep.* **2016**, 18 (11), 104.  
538 <https://doi.org/10.1007/s11920-016-0741-y>.
- 539 (23) Price, M.; Trowsdale, S. The Ethics of Wastewater Surveillance for Public Health. *J.*  
540 *Hydrol. N. Z.* **2022**, 61 (1), 59–75. <https://doi.org/10.3316/informit.548101814967529>.
- 541 (24) LaJoie, A. S.; Holm, R. H.; Anderson, L. B.; Ness, H. D.; Smith, T. Nationwide Public  
542 Perceptions Regarding the Acceptance of Using Wastewater for Community Health  
543 Monitoring in the United States. *PLOS ONE* **2022**, 17 (10), e0275075.  
544 <https://doi.org/10.1371/journal.pone.0275075>.
- 545 (25) Polo, D.; Quintela-Baluja, M.; Corbishley, A.; Jones, D. L.; Singer, A. C.; Graham, D. W.;  
546 Romalde, J. L. Making Waves: Wastewater-Based Epidemiology for COVID-19 –  
547 Approaches and Challenges for Surveillance and Prediction. *Water Res.* **2020**, 186,  
548 116404. <https://doi.org/10.1016/j.watres.2020.116404>.
- 549

- 550 (26) Coffman, M. M.; Guest, J. S.; Wolfe, M. K.; Naughton, C. C.; Boehm, A. B.; Vela, J. D.;  
551 Carrera, J. S. Preventing Scientific and Ethical Misuse of Wastewater Surveillance Data.  
552 *Environ. Sci. Technol.* **2021**, *55* (17), 11473–11475.  
553 <https://doi.org/10.1021/acs.est.1c04325>.
- 554 (27) Ram, N.; Shuster, W.; Gable, L.; Ram, J. L. Ethical and Legal Wastewater Surveillance.  
555 *Science* **2023**, *379* (6633), 652–652. <https://doi.org/10.1126/science.adg7147>.
- 556 (28) Holm, R. H.; Brick, J. M.; Amraotkar, A. R.; Hart, J. L.; Mukherjee, A.; Zeigler, J.; Bushau-  
557 Sprinkle, A. M.; Anderson, L. B.; Walker, K. L.; Talley, D.; Keith, R. J.; Rai, S. N.; Palmer,  
558 K. E.; Bhatnagar, A.; Smith, T. Public Awareness of and Support for the Use of  
559 Wastewater for SARS-CoV-2 Monitoring: A Community Survey in Louisville, Kentucky.  
560 *ACS EST Water* **2022**. <https://doi.org/10.1021/acsestwater.1c00405>.
- 561 (29) Thompson, J. R.; Nancharaiyah, Y. V.; Gu, X.; Lee, W. L.; Rajal, V. B.; Haines, M. B.;  
562 Girones, R.; Ng, L. C.; Alm, E. J.; Wuertz, S. Making Waves: Wastewater Surveillance of  
563 SARS-CoV-2 for Population-Based Health Management. *Water Res.* **2020**, *184*, 116181.  
564 <https://doi.org/10.1016/j.watres.2020.116181>.
- 565 (30) Cooper, B.; Donner, E.; Crase, L.; Robertson, H.; Carter, D.; Short, M.; Drigo, B.; Leder,  
566 K.; Roiko, A.; Fielding, K. Maintaining a Social License to Operate for Wastewater-Based  
567 Monitoring: The Case of Managing Infectious Disease and the COVID-19 Pandemic. *J.*  
568 *Environ. Manage.* **2022**, *320*, 115819. <https://doi.org/10.1016/j.jenvman.2022.115819>.
- 569 (31) Bowes, D. A.; Driver, E. M.; Halden, R. U. A Framework for Wastewater Sample  
570 Collection from a Sewage Cleanout to Inform Building-Scale Wastewater-Based  
571 Epidemiology Studies. *Sci. Total Environ.* **2022**, *836*, 155576.  
572 <https://doi.org/10.1016/j.scitotenv.2022.155576>.
- 573 (32) Hrudehy, S. E.; Silva, D. S.; Shelley, J.; Pons, W.; Isaac-Renton, J.; Chik, A. H.-S.;  
574 Conant, B. Ethics Guidance for Environmental Scientists Engaged in Surveillance of  
575 Wastewater for SARS-CoV-2. *Environ. Sci. Technol.* **2021**, *55* (13), 8484–8491.  
576 <https://doi.org/10.1021/acs.est.1c00308>.
- 577 (33) Manning, S.; Walton, M. *Ethical and Responsible Development of Wastewater-Based*  
578 *Epidemiology Technologies*; report; Institute of Environmental Science and Research,  
579 2021. <https://doi.org/10.26091/ESRNZ.16825243.v1>.
- 580 (34) Prichard, J.; Hall, W.; Zuccato, E.; Voogt, P.; Voulvoulis, N.; Kummerer, K.; Kasprzyk-  
581 Hordern, B.; Barbato, A.; Parabiaghi, A.; Hernandez, F.; others. Ethical Research  
582 Guidelines for Wastewater-Based Epidemiology and Related Fields. *Sew. Anal. Core*  
583 *Group Eur. SCORE* **2016**.
- 584 (35) Prichard, J.; Hall, W.; de Voogt, P.; Zuccato, E. Sewage Epidemiology and Illicit Drug  
585 Research: The Development of Ethical Research Guidelines. *Sci. Total Environ.* **2014**,  
586 *472*, 550–555. <https://doi.org/10.1016/j.scitotenv.2013.11.039>.
- 587 (36) Savulescu, J. Editorial: Two Deaths and Two Lessons: Is It Time to Review the Structure  
588 and Function of Research Ethics Committees? *J. Med. Ethics* **2002**, *28* (1), 1–2.
- 589 (37) Marx, G. T. Ethics for the New Surveillance. *Inf. Soc.* **1998**, *14* (3), 171–185.  
590 <https://doi.org/10.1080/019722498128809>.
- 591 (38) Wong, J. C. C.; Tan, J.; Lim, Y. X.; Arivalan, S.; Hapuarachchi, H. C.; Mailepessov, D.;  
592 Griffiths, J.; Jayarajah, P.; Setoh, Y. X.; Tien, W. P.; Low, S. L.; Koo, C.; Yenamandra, S.  
593 P.; Kong, M.; Lee, V. J. M.; Ng, L. C. Non-Intrusive Wastewater Surveillance for  
594 Monitoring of a Residential Building for COVID-19 Cases. *Sci. Total Environ.* **2021**, *786*,  
595 147419. <https://doi.org/10.1016/j.scitotenv.2021.147419>.
- 596 (39) Kirby, A. E.; Walters, M. S.; Jennings, W. C.; Fugitt, R.; LaCross, N.; Mattioli, M.; Marsh,  
597 Z. A.; Roberts, V. A.; Mercante, J. W.; Yoder, J.; Hill, V. R. Using Wastewater  
598 Surveillance Data to Support the COVID-19 Response — United States, 2020–2021.

- 599 *Morb. Mortal. Wkly. Rep.* **2021**, 70 (36), 1242–1244.  
600 <https://doi.org/10.15585/mmwr.mm7036a2>.
- 601 (40) Gupta, U. C. Informed Consent in Clinical Research: Revisiting Few Concepts and Areas.  
602 *Perspect. Clin. Res.* **2013**, 4 (1), 26–32. <https://doi.org/10.4103/2229-3485.106373>.
- 603 (41) Lee, L. M. Health Information in the Background: Justifying Public Health Surveillance  
604 Without Patient Consent. In *Emerging Pervasive Information and Communication*  
605 *Technologies (PICT): Ethical Challenges, Opportunities and Safeguards*; Pimple, K. D.,  
606 Ed.; Law, Governance and Technology Series; Springer Netherlands: Dordrecht, 2014;  
607 pp 39–53. [https://doi.org/10.1007/978-94-007-6833-8\\_3](https://doi.org/10.1007/978-94-007-6833-8_3).
- 608 (42) Wright, J.; Driver, E. M.; Bowes, D. A.; Johnston, B.; Halden, R. U. Comparison of High-  
609 Frequency in-Pipe SARS-CoV-2 Wastewater-Based Surveillance to Concurrent COVID-  
610 19 Random Clinical Testing on a Public U.S. University Campus. *Sci. Total Environ.*  
611 **2022**, 820, 152877. <https://doi.org/10.1016/j.scitotenv.2021.152877>.
- 612 (43) Betancourt, W. Q.; Schmitz, B. W.; Innes, G. K.; Prasek, S. M.; Pogreba Brown, K. M.;  
613 Stark, E. R.; Foster, A. R.; Sprissler, R. S.; Harris, D. T.; Sherchan, S. P.; Gerba, C. P.;  
614 Pepper, I. L. COVID-19 Containment on a College Campus via Wastewater-Based  
615 Epidemiology, Targeted Clinical Testing and an Intervention. *Sci. Total Environ.* **2021**,  
616 779, 146408. <https://doi.org/10.1016/j.scitotenv.2021.146408>.
- 617 (44) Schmitz, B. W.; Innes, G. K.; Prasek, S. M.; Betancourt, W. Q.; Stark, E. R.; Foster, A. R.;  
618 Abraham, A. G.; Gerba, C. P.; Pepper, I. L. Enumerating Asymptomatic COVID-19 Cases  
619 and Estimating SARS-CoV-2 Fecal Shedding Rates via Wastewater-Based  
620 Epidemiology. *Sci. Total Environ.* **2021**, 801, 149794.  
621 <https://doi.org/10.1016/j.scitotenv.2021.149794>.
- 622 (45) Reeves, K.; Liebig, J.; Feula, A.; Saldi, T.; Lasda, E.; Johnson, W.; Lilienfeld, J.; Maggi,  
623 J.; Pulley, K.; Wilkerson, P. J.; Real, B.; Zak, G.; Davis, J.; Fink, M.; Gonzales, P.; Hager,  
624 C.; Ozeroff, C.; Tat, K.; Alkire, M.; Butler, C.; Coe, E.; Darby, J.; Freeman, N.; Heuer, H.;  
625 Jones, J. R.; Karr, M.; Key, S.; Maxwell, K.; Nelson, L.; Saldana, E.; Shea, R.; Salvesson,  
626 L.; Tomlinson, K.; Vargas-Barriga, J.; Vigil, B.; Brisson, G.; Parker, R.; Leinwand, L. A.;  
627 Bjorkman, K.; Mansfeldt, C. High-Resolution within-Sewer SARS-CoV-2 Surveillance  
628 Facilitates Informed Intervention. *Water Res.* **2021**, 204, 117613.  
629 <https://doi.org/10.1016/j.watres.2021.117613>.
- 630 (46) Brooks, Y. M.; Gryskwicz, B.; Sheehan, S.; Piers, S.; Mahale, P.; McNeil, S.; Chase, J.;  
631 Webber, D.; Borys, D.; Hilton, M.; Robinson, D.; Sears, S.; Smith, E.; Leshner, E. K.;  
632 Wilson, R.; Goodwin, M.; Pardales, M. Detection of SARS-CoV-2 in Wastewater at  
633 Residential College, Maine, USA, August–November 2020. *Emerg. Infect. Dis.* **2021**, 27  
634 (12), 3111–3114. <https://doi.org/10.3201/eid2712.211199>.
- 635 (47) Coxon, S. E.; Hopley, T.; Gilpin, B. J. Exploring Opportunities for Sewage Testing on  
636 Cargo Ships as a Tool to Screen Seafarers for COVID-19. *J. Hydrol. N. Z.* **2022**, 61 (1),  
637 5–30. <https://doi.org/10.3316/informit.548045916053754>.
- 638 (48) Ahmed, W.; Bivins, A.; Simpson, S. L.; Bertsch, P. M.; Ehret, J.; Hosegood, I.; Metcalfe,  
639 S. S.; Smith, W. J. M.; Thomas, K. V.; Tynan, J.; Mueller, J. F. Wastewater Surveillance  
640 Demonstrates High Predictive Value for COVID-19 Infection on Board Repatriation Flights  
641 to Australia. *Environ. Int.* **2022**, 158, 106938.  
642 <https://doi.org/10.1016/j.envint.2021.106938>.
- 643 (49) Safford, H. R.; Shapiro, K.; Bischel, H. N. Wastewater Analysis Can Be a Powerful Public  
644 Health Tool—If It's Done Sensibly. *Proc. Natl. Acad. Sci.* **2022**, 119 (6), e2119600119.  
645 <https://doi.org/10.1073/pnas.2119600119>.
- 646 (50) Acosta, N.; Bautista, M. A.; Hollman, J.; McCalder, J.; Beaudet, A. B.; Man, L.; Waddell,  
647 B. J.; Chen, J.; Li, C.; Kuzma, D.; Bhatnagar, S.; Leal, J.; Meddings, J.; Hu, J.; Cabaj, J.



- 648 L.; Ruecker, N. J.; Naugler, C.; Pillai, D. R.; Achari, G.; Ryan, M. C.; Conly, J. M.;  
649 Frankowski, K.; Hubert, C. R.; Parkins, M. D. A Multicenter Study Investigating SARS-  
650 CoV-2 in Tertiary-Care Hospital Wastewater. Viral Burden Correlates with Increasing  
651 Hospitalized Cases as Well as Hospital-Associated Transmissions and Outbreaks. *Water*  
652 *Res.* **2021**, *201*, 117369. <https://doi.org/10.1016/j.watres.2021.117369>.
- 653 (51) Ahmed, W.; Angel, N.; Edson, J.; Bibby, K.; Bivins, A.; O'Brien, J. W.; Choi, P. M.;  
654 Kitajima, M.; Simpson, S. L.; Li, J.; Tscharke, B.; Verhagen, R.; Smith, W. J. M.; Zaugg,  
655 J.; Dierens, L.; Hugenholtz, P.; Thomas, K. V.; Mueller, J. F. First Confirmed Detection of  
656 SARS-CoV-2 in Untreated Wastewater in Australia: A Proof of Concept for the  
657 Wastewater Surveillance of COVID-19 in the Community. *Sci. Total Environ.* **2020**, *728*,  
658 138764. <https://doi.org/10.1016/j.scitotenv.2020.138764>.
- 659 (52) Ahmed, F.; Islam, Md. A.; Kumar, M.; Hossain, M.; Bhattacharya, P.; Islam, Md. T.;  
660 Hossen, F.; Hossain, Md. S.; Islam, Md. S.; Uddin, Md. M.; Islam, Md. N.; Bahadur, N. M.;  
661 Didar-ul-Alam, Md.; Reza, H. M.; Jakariya, Md. First Detection of SARS-CoV-2 Genetic  
662 Material in the Vicinity of COVID-19 Isolation Centre in Bangladesh: Variation along the  
663 Sewer Network. *Sci. Total Environ.* **2021**, *776*, 145724.  
664 <https://doi.org/10.1016/j.scitotenv.2021.145724>.
- 665 (53) Albastaki, A.; Najji, M.; Lootah, R.; Almeheiri, R.; Almulla, H.; Almarri, I.; Alreyami, A.;  
666 Aden, A.; Alghafri, R. First Confirmed Detection of SARS-COV-2 in Untreated Municipal  
667 and Aircraft Wastewater in Dubai, UAE: The Use of Wastewater Based Epidemiology as  
668 an Early Warning Tool to Monitor the Prevalence of COVID-19. *Sci. Total Environ.* **2021**,  
669 *760*, 143350. <https://doi.org/10.1016/j.scitotenv.2020.143350>.
- 670 (54) Arora, S.; Nag, A.; Sethi, J.; Rajvanshi, J.; Saxena, S.; Shrivastava, S. K.; Gupta, A. B.  
671 Sewage Surveillance for the Presence of SARS-CoV-2 Genome as a Useful Wastewater  
672 Based Epidemiology (WBE) Tracking Tool in India. *Water Sci. Technol. J. Int. Assoc.*  
673 *Water Pollut. Res.* **2020**, *82* (12), 2823–2836. <https://doi.org/10.2166/wst.2020.540>.
- 674 (55) Barrios, R. E.; Lim, C.; Kelley, M. S.; Li, X. SARS-CoV-2 Concentrations in a Wastewater  
675 Collection System Indicated Potential COVID-19 Hotspots at the Zip Code Level. *Sci.*  
676 *Total Environ.* **2021**, *800*, 149480. <https://doi.org/10.1016/j.scitotenv.2021.149480>.
- 677 (56) Bivins, A.; Bibby, K. Wastewater Surveillance during Mass COVID-19 Vaccination on a  
678 College Campus. *Environ. Sci. Technol. Lett.* **2021**, *8* (9), 792–798.  
679 <https://doi.org/10.1021/acs.estlett.1c00519>.
- 680 (57) Bivins, A.; Lott, M.; Shaffer, M.; Wu, Z.; North, D.; K. Lipp, E.; Bibby, K. Building-Level  
681 Wastewater Surveillance Using Tampon Swabs and RT-LAMP for Rapid SARS-CoV-2  
682 RNA Detection. *Environ. Sci. Water Res. Technol.* **2022**, *8* (1), 173–183.  
683 <https://doi.org/10.1039/D1EW00496D>.
- 684 (58) Black, J.; Aung, P.; Nolan, M.; Roney, E.; Poon, R.; Hennessy, D.; Crosbie, N. D.; Deere,  
685 D.; Jex, A. R.; John, N.; Baker, L.; Scales, P. J.; Usher, S. P.; McCarthy, D. T.; Schang,  
686 C.; Schmidt, J.; Myers, S.; Bogue, N.; Kaucner, C.; Thorley, B.; Druce, J.; Monis, P.; Lau,  
687 M.; Sarkis, S. Epidemiological Evaluation of Sewage Surveillance as a Tool to Detect the  
688 Presence of COVID-19 Cases in a Low Case Load Setting. *Sci. Total Environ.* **2021**, *786*,  
689 147469. <https://doi.org/10.1016/j.scitotenv.2021.147469>.
- 690 (59) Carrillo-Reyes, J.; Barragán-Trinidad, M.; Buitrón, G. Surveillance of SARS-CoV-2 in  
691 Sewage and Wastewater Treatment Plants in Mexico. *J. Water Process Eng.* **2021**, *40*,  
692 101815. <https://doi.org/10.1016/j.jwpe.2020.101815>.
- 693 (60) Chakraborty, P.; Pasupuleti, M.; Jai Shankar, M. R.; Bharat, G. K.; Krishnasamy, S.;  
694 Dasgupta, S. C.; Sarkar, S. K.; Jones, K. C. First Surveillance of SARS-CoV-2 and  
695 Organic Tracers in Community Wastewater during Post Lockdown in Chennai, South

- 696 India: Methods, Occurrence and Concurrence. *Sci. Total Environ.* **2021**, 778, 146252.  
697 <https://doi.org/10.1016/j.scitotenv.2021.146252>.
- 698 (61) Colosi, L. M.; Barry, K. E.; Kotay, S. M.; Porter, M. D.; Poulter, M. D.; Ratliff, C.;  
699 Simmons, W.; Steinberg, L. I.; Wilson, D. D.; Morse, R.; Zmick, P.; Mathers, A. J.  
700 Development of Wastewater Pooled Surveillance of Severe Acute Respiratory Syndrome  
701 Coronavirus 2 (SARS-CoV-2) from Congregate Living Settings. *Appl. Environ. Microbiol.*  
702 **2021**. <https://doi.org/10.1128/AEM.00433-21>.
- 703 (62) Corchis-Scott, R.; Geng, Q.; Seth, R.; Ray, R.; Beg, M.; Biswas, N.; Charron, L.;  
704 Drouillard, K. D.; D'Souza, R.; Heath, D. D.; Houser, C.; Lawal, F.; McGinlay, J.; Menard,  
705 S. L.; Porter, L. A.; Rawlings, D.; Scholl, M. L.; Siu, K. W. M.; Tong, Y.; Weisener, C. G.;  
706 Wilhelm, S. W.; McKay, R. M. L. Averting an Outbreak of SARS-CoV-2 in a University  
707 Residence Hall through Wastewater Surveillance. *Microbiol. Spectr.* **2021**.  
708 <https://doi.org/10.1128/Spectrum.00792-21>.
- 709 (63) Crowe, J.; Schnaubelt, A. T.; SchmidtBonne, S.; Angell, K.; Bai, J.; Eske, T.; Nicklin, M.;  
710 Pratt, C.; White, B.; Crofts-Hannibal, B.; Staffend, N.; Herrera, V.; Cobb, J.; Conner, J.;  
711 Carstens, J.; Tempero, J.; Bouda, L.; Ray, M.; Lawler, J. V.; Campbell, W. S.; Lowe, J.-  
712 M.; Santarpia, J.; Bartelt-Hunt, S.; Wiley, M.; Brett-Major, D.; Logan, C.; Broadhurst, M. J.  
713 Assessment of a Program for SARS-CoV-2 Screening and Environmental Monitoring in  
714 an Urban Public School District. *JAMA Netw. Open* **2021**, 4 (9), e2126447.  
715 <https://doi.org/10.1001/jamanetworkopen.2021.26447>.
- 716 (64) Daigle, J.; Racher, K.; Hazenberg, J.; Yeoman, A.; Hannah, H.; Duong, D.; Mohammed,  
717 U.; Spreitzer, D.; Gregorchuk, B. S. J.; Head, B. M.; Meyers, A. F. A.; Sandstrom, P. A.;  
718 Nichani, A.; Brooks, J. I.; Mulvey, M. R.; Mangat, C. S.; Becker, M. G. A Sensitive and  
719 Rapid Wastewater Test for SARS-COV-2 and Its Use for the Early Detection of a Cluster  
720 of Cases in a Remote Community. *medRxiv* **2021**, 2021.08.13.21262039.  
721 <https://doi.org/10.1101/2021.08.13.21262039>.
- 722 (65) Fahrenfeld, N. L.; Morales Medina, W. R.; D'Elia, S.; Modica, M.; Ruiz, A.; McLane, M.  
723 Comparison of Residential Dormitory COVID-19 Monitoring via Weekly Saliva Testing  
724 and Sewage Monitoring. *Sci. Total Environ.* **2021**, 151947.  
725 <https://doi.org/10.1016/j.scitotenv.2021.151947>.
- 726 (66) Fongaro, G.; Rogovski, P.; Savi, B. P.; Cadamuro, R. D.; Pereira, J. V. F.; Anna, I. H. S.;  
727 Rodrigues, I. H.; Souza, D. S. M.; Saravia, E. G. T.; Rodríguez-Lázaro, D.; da Silva  
728 Lanna, M. C. SARS-CoV-2 in Human Sewage and River Water from a Remote and  
729 Vulnerable Area as a Surveillance Tool in Brazil. *Food Environ. Virol.* **2021**.  
730 <https://doi.org/10.1007/s12560-021-09487-9>.
- 731 (67) Galani, A.; Aalizadeh, R.; Kostakis, M.; Markou, A.; Alygizakis, N.; Lytras, T.;  
732 Adamopoulos, P. G.; Peccia, J.; Thompson, D. C.; Kontou, A.; Karagiannidis, A.;  
733 Lianidou, E. S.; Avgeris, M.; Paraskevis, D.; Tsiodras, S.; Scorilas, A.; Vasiliou, V.;  
734 Dimopoulos, M.-A.; Thomaidis, N. S. SARS-CoV-2 Wastewater Surveillance Data Can  
735 Predict Hospitalizations and ICU Admissions. *Sci. Total Environ.* **2022**, 804, 150151.  
736 <https://doi.org/10.1016/j.scitotenv.2021.150151>.
- 737 (68) Gerrity, D.; Papp, K.; Stoker, M.; Sims, A.; Frehner, W. Early-Pandemic Wastewater  
738 Surveillance of SARS-CoV-2 in Southern Nevada: Methodology, Occurrence, and  
739 Incidence/Prevalence Considerations. *Water Res. X* **2021**, 10, 100086.  
740 <https://doi.org/10.1016/j.wroa.2020.100086>.
- 741 (69) Gibas, C.; Lambirth, K.; Mittal, N.; Juel, M. A. I.; Barua, V. B.; Roppolo Brazell, L.; Hinton,  
742 K.; Lontai, J.; Stark, N.; Young, I.; Quach, C.; Russ, M.; Kauer, J.; Nicolosi, B.; Chen, D.;  
743 Akella, S.; Tang, W.; Schlueter, J.; Munir, M. Implementing Building-Level SARS-CoV-2

- 744 Wastewater Surveillance on a University Campus. *Sci. Total Environ.* **2021**, 782, 146749.  
745 <https://doi.org/10.1016/j.scitotenv.2021.146749>.
- 746 (70) Giraud-Billoud, M.; Cuervo, P.; Altamirano, J. C.; Pizarro, M.; Aranibar, J. N.; Catapano,  
747 A.; Cuello, H.; Masachessi, G.; Vega, I. A. Monitoring of SARS-CoV-2 RNA in  
748 Wastewater as an Epidemiological Surveillance Tool in Mendoza, Argentina. *Sci. Total*  
749 *Environ.* **2021**, 796, 148887. <https://doi.org/10.1016/j.scitotenv.2021.148887>.
- 750 (71) Godinez, A.; Hill, D.; Dandaraw, B.; Green, H.; Kilaru, P.; Middleton, F.; Run, S.; Kmush,  
751 B. L.; Larsen, D. A. High Sensitivity and Specificity of Dormitory-Level Wastewater  
752 Surveillance for COVID-19 during Fall Semester 2020 at Syracuse University, New York.  
753 *Int. J. Environ. Res. Public Health* **2022**, 19 (8), 4851.  
754 <https://doi.org/10.3390/ijerph19084851>.
- 755 (72) Gonçalves, J.; Koritnik, T.; Mioč, V.; Trkov, M.; Bolješič, M.; Berginc, N.; Prosenč, K.;  
756 Kotar, T.; Paragi, M. Detection of SARS-CoV-2 RNA in Hospital Wastewater from a Low  
757 COVID-19 Disease Prevalence Area. *Sci. Total Environ.* **2021**, 755, 143226.  
758 <https://doi.org/10.1016/j.scitotenv.2020.143226>.
- 759 (73) Haak, L.; Delic, B.; Li, L.; Guarin, T.; Mazurowski, L.; Dastjerdi, N. G.; Dewan, A.; Pagilla,  
760 K. Spatial and Temporal Variability and Data Bias in Wastewater Surveillance of SARS-  
761 CoV-2 in a Sewer System. *Sci. Total Environ.* **2022**, 805, 150390.  
762 <https://doi.org/10.1016/j.scitotenv.2021.150390>.
- 763 (74) Hasan, S. W.; Ibrahim, Y.; Daou, M.; Kannout, H.; Jan, N.; Lopes, A.; Alsafar, H.; Yousef,  
764 A. F. Detection and Quantification of SARS-CoV-2 RNA in Wastewater and Treated  
765 Effluents: Surveillance of COVID-19 Epidemic in the United Arab Emirates. *Sci. Total*  
766 *Environ.* **2021**, 764, 142929–142929. <https://doi.org/10.1016/j.scitotenv.2020.142929>.
- 767 (75) Hong, P.-Y.; Rachmadi, A. T.; Mantilla-Calderon, D.; Alkahtani, M.; Bashawri, Y. M.; Al  
768 Qarni, H.; O'Reilly, K. M.; Zhou, J. Estimating the Minimum Number of SARS-CoV-2  
769 Infected Cases Needed to Detect Viral RNA in Wastewater: To What Extent of the  
770 Outbreak Can Surveillance of Wastewater Tell Us? *Environ. Res.* **2021**, 195, 110748.  
771 <https://doi.org/10.1016/j.envres.2021.110748>.
- 772 (76) Juel, M. A. I.; Stark, N.; Nicolosi, B.; Lontai, J.; Lambirth, K.; Schlueter, J.; Gibas, C.;  
773 Munir, M. Performance Evaluation of Virus Concentration Methods for Implementing  
774 SARS-CoV-2 Wastewater Based Epidemiology Emphasizing Quick Data Turnaround.  
775 *Sci. Total Environ.* **2021**, 801, 149656. <https://doi.org/10.1016/j.scitotenv.2021.149656>.
- 776 (77) Karami, C.; Dargahi, A.; Vosoughi, M.; Normohammadi, A.; Jeddi, F.; Asghariazar, V.;  
777 Mokhtari, A.; Sedigh, A.; Zandian, H.; Alighadri, M. SARS-CoV-2 in Municipal Wastewater  
778 Treatment Plant, Collection Network, and Hospital Wastewater. *Environ. Sci. Pollut. Res.*  
779 **2021**. <https://doi.org/10.1007/s11356-021-15374-4>.
- 780 (78) Karthikeyan, S.; Nguyen, A.; McDonald, D.; Zong, Y.; Ronquillo, N.; Ren, J.; Zou, J.;  
781 Farmer, S.; Humphrey, G.; Henderson, D.; Javidi, T.; Messer, K.; Anderson, C.;  
782 Schooley, R.; Martin, N. K.; Knight, R. Rapid, Large-Scale Wastewater Surveillance and  
783 Automated Reporting System Enable Early Detection of Nearly 85% of COVID-19 Cases  
784 on a University Campus. *mSystems* **2021**. <https://doi.org/10.1128/mSystems.00793-21>.
- 785 (79) Kitamura, K.; Sadamasu, K.; Muramatsu, M.; Yoshida, H. Efficient Detection of SARS-  
786 CoV-2 RNA in the Solid Fraction of Wastewater. *Sci. Total Environ.* **2021**, 763, 144587.  
787 <https://doi.org/10.1016/j.scitotenv.2020.144587>.
- 788 (80) Koureas, M.; Amoutzias, G. D.; Vontas, A.; Kyritsi, M.; Pinaka, O.; Papakonstantinou, A.;  
789 Dadouli, K.; Hatzinikou, M.; Koutsolioutsou, A.; Mouchtouri, V. A.; Speletas, M.; Tsiodras,  
790 S.; Hadjichristodoulou, C. Wastewater Monitoring as a Supplementary Surveillance Tool  
791 for Capturing SARS-COV-2 Community Spread. A Case Study in Two Greek

- 792 Municipalities. *Environ. Res.* **2021**, *200*, 111749.  
793 <https://doi.org/10.1016/j.envres.2021.111749>.
- 794 (81) Kumar, M.; Patel, A. K.; Shah, A. V.; Raval, J.; Rajpara, N.; Joshi, M.; Joshi, C. G. First  
795 Proof of the Capability of Wastewater Surveillance for COVID-19 in India through  
796 Detection of Genetic Material of SARS-CoV-2. *Sci. Total Environ.* **2020**, *746*, 141326.  
797 <https://doi.org/10.1016/j.scitotenv.2020.141326>.
- 798 (82) Landstrom, M.; Braun, E.; Larson, E.; Miller, M.; Holm, G. H. Efficacy of SARS-CoV-2  
799 Wastewater Surveillance for Detection of COVID-19 at a Residential Private College.  
800 medRxiv September 22, 2021, p 2021.09.15.21263338.  
801 <https://doi.org/10.1101/2021.09.15.21263338>.
- 802 (83) Li, B.; Di, D. Y. W.; Saingam, P.; Jeon, M. K.; Yan, T. Fine-Scale Temporal Dynamics of  
803 SARS-CoV-2 RNA Abundance in Wastewater during A COVID-19 Lockdown. *Water Res.*  
804 **2021**, *197*, 117093. <https://doi.org/10.1016/j.watres.2021.117093>.
- 805 (84) Melvin, R. G.; Hendrickson, E. N.; Chaudhry, N.; Georgewill, O.; Freese, R.; Schacker, T.  
806 W.; Simmons, G. E. A Novel Wastewater-Based Epidemiology Indexing Method Predicts  
807 SARS-CoV-2 Disease Prevalence across Treatment Facilities in Metropolitan and  
808 Regional Populations. *Sci. Rep.* **2021**, *11* (1), 21368. [https://doi.org/10.1038/s41598-021-](https://doi.org/10.1038/s41598-021-00853-y)  
809 [00853-y](https://doi.org/10.1038/s41598-021-00853-y).
- 810 (85) Mota, C. R.; Bressani-Ribeiro, T.; Araújo, J. C.; Leal, C. D.; Leroy-Freitas, D.; Machado,  
811 E. C.; Espinosa, M. F.; Fernandes, L.; Leão, T. L.; Chamhum-Silva, L.; Azevedo, L.;  
812 Morandi, T.; Freitas, G. T. O.; Costa, M. S.; Carvalho, B. O.; Reis, M. T. P.; Melo, M. C.;  
813 Ayrimoraes, S. R.; Chernicharo, C. A. L. Assessing Spatial Distribution of COVID-19  
814 Prevalence in Brazil Using Decentralised Sewage Monitoring. *Water Res.* **2021**, *202*,  
815 117388–117388. <https://doi.org/10.1016/j.watres.2021.117388>.
- 816 (86) Nemudryi, A.; Nemudraia, A.; Wiegand, T.; Surya, K.; Buyukyoruk, M.; Cicha, C.;  
817 Vanderwood, K. K.; Wilkinson, R.; Wiedenheft, B. Temporal Detection and Phylogenetic  
818 Assessment of SARS-CoV-2 in Municipal Wastewater. *Cell Rep. Med.* **2020**, *1* (6),  
819 100098. <https://doi.org/10.1016/j.xcrm.2020.100098>.
- 820 (87) Prado, T.; Fumian, T. M.; Mannarino, C. F.; Resende, P. C.; Motta, F. C.; Eppinghaus, A.  
821 L. F.; Chagas do Vale, V. H.; Braz, R. M. S.; de Andrade, J. da S. R.; Maranhão, A. G.;  
822 Miagostovich, M. P. Wastewater-Based Epidemiology as a Useful Tool to Track SARS-  
823 CoV-2 and Support Public Health Policies at Municipal Level in Brazil. *Water Res.* **2021**,  
824 *191*, 116810–116810. <https://doi.org/10.1016/j.watres.2021.116810>.
- 825 (88) Rodríguez Rasero, F. J.; Moya Ruano, L. A.; Rasero Del Real, P.; Cuberos Gómez, L.;  
826 Lorusso, N. Associations between SARS-CoV-2 RNA Concentrations in Wastewater and  
827 COVID-19 Rates in Days after Sampling in Small Urban Areas of Seville: A Time Series  
828 Study. *Sci. Total Environ.* **2022**, *806*, 150573.  
829 <https://doi.org/10.1016/j.scitotenv.2021.150573>.
- 830 (89) Rios, G.; Lacoux, C.; Leclercq, V.; Diamant, A.; Lebrigand, K.; Lazuka, A.; Soyeux, E.;  
831 Lacroix, S.; Fassy, J.; Couesnon, A.; Thiery, R.; Mari, B.; Pradier, C.; Waldmann, R.;  
832 Barbry, P. Monitoring SARS-CoV-2 Variants Alterations in Nice Neighborhoods by  
833 Wastewater Nanopore Sequencing. *Lancet Reg. Health - Eur.* **2021**, *10*, 100202.  
834 <https://doi.org/10.1016/j.lanepe.2021.100202>.
- 835 (90) Scott, L. C.; Aubee, A.; Babahaji, L.; Vigil, K.; Tims, S.; Aw, T. G. Targeted Wastewater  
836 Surveillance of SARS-CoV-2 on a University Campus for COVID-19 Outbreak Detection  
837 and Mitigation. *Environ. Res.* **2021**, *200*, 111374.  
838 <https://doi.org/10.1016/j.envres.2021.111374>.
- 839 (91) Sherchan, S. P.; Shahin, S.; Ward, L. M.; Tandukar, S.; Aw, T. G.; Schmitz, B.; Ahmed,  
840 W.; Kitajima, M. First Detection of SARS-CoV-2 RNA in Wastewater in North America: A

- 841 Study in Louisiana, USA. *Sci. Total Environ.* **2020**, 743, 140621.  
842 <https://doi.org/10.1016/j.scitotenv.2020.140621>.
- 843 (92) Spurbeck, R. R.; Minard-Smith, A.; Catlin, L. Feasibility of Neighborhood and Building  
844 Scale Wastewater-Based Genomic Epidemiology for Pathogen Surveillance. *Sci. Total*  
845 *Environ.* **2021**, 789, 147829–147829. <https://doi.org/10.1016/j.scitotenv.2021.147829>.
- 846 (93) Sweetapple, C.; Melville-Shreeve, P.; Chen, A. S.; Grimsley, J. M. S.; Bunce, J. T.; Gaze,  
847 W.; Fielding, S.; Wade, M. J. Building Knowledge of University Campus Population  
848 Dynamics to Enhance Near-to-Source Sewage Surveillance for SARS-CoV-2 Detection.  
849 *Sci. Total Environ.* **2022**, 806, 150406. <https://doi.org/10.1016/j.scitotenv.2021.150406>.
- 850 (94) Vo, V.; Tillett, R. L.; Chang, C.-L.; Gerrity, D.; Betancourt, W. Q.; Oh, E. C. SARS-CoV-2  
851 Variant Detection at a University Dormitory Using Wastewater Genomic Tools. *Sci. Total*  
852 *Environ.* **2022**, 805, 149930. <https://doi.org/10.1016/j.scitotenv.2021.149930>.
- 853 (95) Wang, Y.; Liu, P.; Zhang, H.; Ibaraki, M.; VanTassell, J.; Geith, K.; Cavallo, M.; Kann, R.;  
854 Saber, L.; Kraft, C. S.; Lane, M.; Shartar, S.; Moe, C. Early Warning of a COVID-19 Surge  
855 on a University Campus Based on Wastewater Surveillance for SARS-CoV-2 at  
856 Residence Halls. *Sci. Total Environ.* **2022**, 821, 153291.  
857 <https://doi.org/10.1016/j.scitotenv.2022.153291>.
- 858 (96) Wurtz, N.; Revol, O.; Jardot, P.; Giraud-Gatineau, A.; Houhamdi, L.; Soumagnac, C.;  
859 Annessi, A.; Lacoste, A.; Colson, P.; Aherfi, S.; La Scola, B. Monitoring the Circulation of  
860 SARS-CoV-2 Variants by Genomic Analysis of Wastewater in Marseille, South-East  
861 France. *Pathogens* **2021**, 10 (8), 1042. <https://doi.org/10.3390/pathogens10081042>.
- 862 (97) Xu, X.; Zheng, X.; Li, S.; Lam, N. S.; Wang, Y.; Chu, D. K. W.; Poon, L. L. M.; Tun, H. M.;  
863 Peiris, M.; Deng, Y.; Leung, G. M.; Zhang, T. The First Case Study of Wastewater-Based  
864 Epidemiology of COVID-19 in Hong Kong. *Sci. Total Environ.* **2021**, 790, 148000.  
865 <https://doi.org/10.1016/j.scitotenv.2021.148000>.
- 866 (98) Yeager, R.; Holm, R. H.; Saurabh, K.; Fuqua, J. L.; Talley, D.; Bhatnagar, A.; Smith, T.  
867 Wastewater Sample Site Selection to Estimate Geographically Resolved Community  
868 Prevalence of COVID-19: A Sampling Protocol Perspective. *GeoHealth* **2021**, 5 (7),  
869 e2021gh000420. <https://doi.org/10.1029/2021gh000420>.
- 870 (99) Zdenkova, K.; Bartackova, J.; Cermakova, E.; Demnerova, K.; Dostalkova, A.; Janda, V.;  
871 Novakova, Z.; Rumlova, M.; Ambrozova, J. R.; Skodakova, K.; Swierczkova, I.; Sykora,  
872 P.; Vejmelkova, D.; Wanner, J.; Bartacek, J. Monitoring COVID-19 Spread in Prague  
873 Local Neighborhoods Based on the Presence of SARS-CoV-2 RNA in Wastewater  
874 Collected throughout the Sewer Network. *medRxiv* **2021**, 2021.07.28.21261272.  
875 <https://doi.org/10.1101/2021.07.28.21261272>.
- 876 (100) Korfmacher, K. S.; Harris, -Lovett Sasha. Invited Perspective: Implementation of  
877 Wastewater-Based Surveillance Requires Collaboration, Integration, and Community  
878 Engagement. *Environ. Health Perspect.* **130** (5), 051304.  
879 <https://doi.org/10.1289/EHP11191>.
- 880 (101) Berkman, B. E.; Mastroianni, A. C.; Jamal, L.; Solis, C.; Taylor, H. A.; Hull, S. C. The  
881 Ethics of Repurposing Previously Collected Research Biospecimens in an Infectious  
882 Disease Pandemic. *Ethics Hum. Res.* **2021**, 43 (2), 2–18.  
883 <https://doi.org/10.1002/eahr.500083>.
- 884 (102) Vears, D. F.; Borry, P.; Savulescu, J.; Koplin, J. J. Old Challenges or New Issues?  
885 Genetic Health Professionals' Experiences Obtaining Informed Consent in Diagnostic  
886 Genomic Sequencing. *AJOB Empir. Bioeth.* **2021**, 12 (1), 12–23.  
887 <https://doi.org/10.1080/23294515.2020.1823906>.

- 888 (103) Dupras, C.; Bunnik, E. M. Toward a Framework for Assessing Privacy Risks in Multi-Omic  
889 Research and Databases. *Am. J. Bioeth.* **2021**, *21* (12), 46–64.  
890 <https://doi.org/10.1080/15265161.2020.1863516>.
- 891 (104) Yang, Z.; Xu, G.; Reboud, J.; Kasprzyk-Hordern, B.; Cooper, J. M. Monitoring Genetic  
892 Population Biomarkers for Wastewater-Based Epidemiology. *Anal. Chem.* **2017**, *89* (18),  
893 9941–9945. <https://doi.org/10.1021/acs.analchem.7b02257>.
- 894 (105) Machado, H.; Silva, S.; Cunha, M. Multiple Views of DNA Surveillance: The Surveilled,  
895 the Surveillants and the Academics. In *Crime, Security and Surveillance. Effects for the*  
896 *Surveillant and the Surveilled*; Boom Eleven Publishers, 2012; pp 179–194.
- 897 (106) *Wastewater-Based Disease Surveillance for Public Health Action*; National Academies of  
898 Sciences, Engineer (WASHINGTON, District of Columbia), Ed.; The National Academies  
899 Press: WASHINGTON, 2023.
- 900  
901  
902
