# Supplementary material for: Structured Ethical Review for Wastewater-Based Testing
Source: medRxiv preprint, doi:10.1101/2023.06.12.23291231, version 1 (2023-06-14)
Supplement: Supplemental Figure 1 [file 291231_file03.docx]

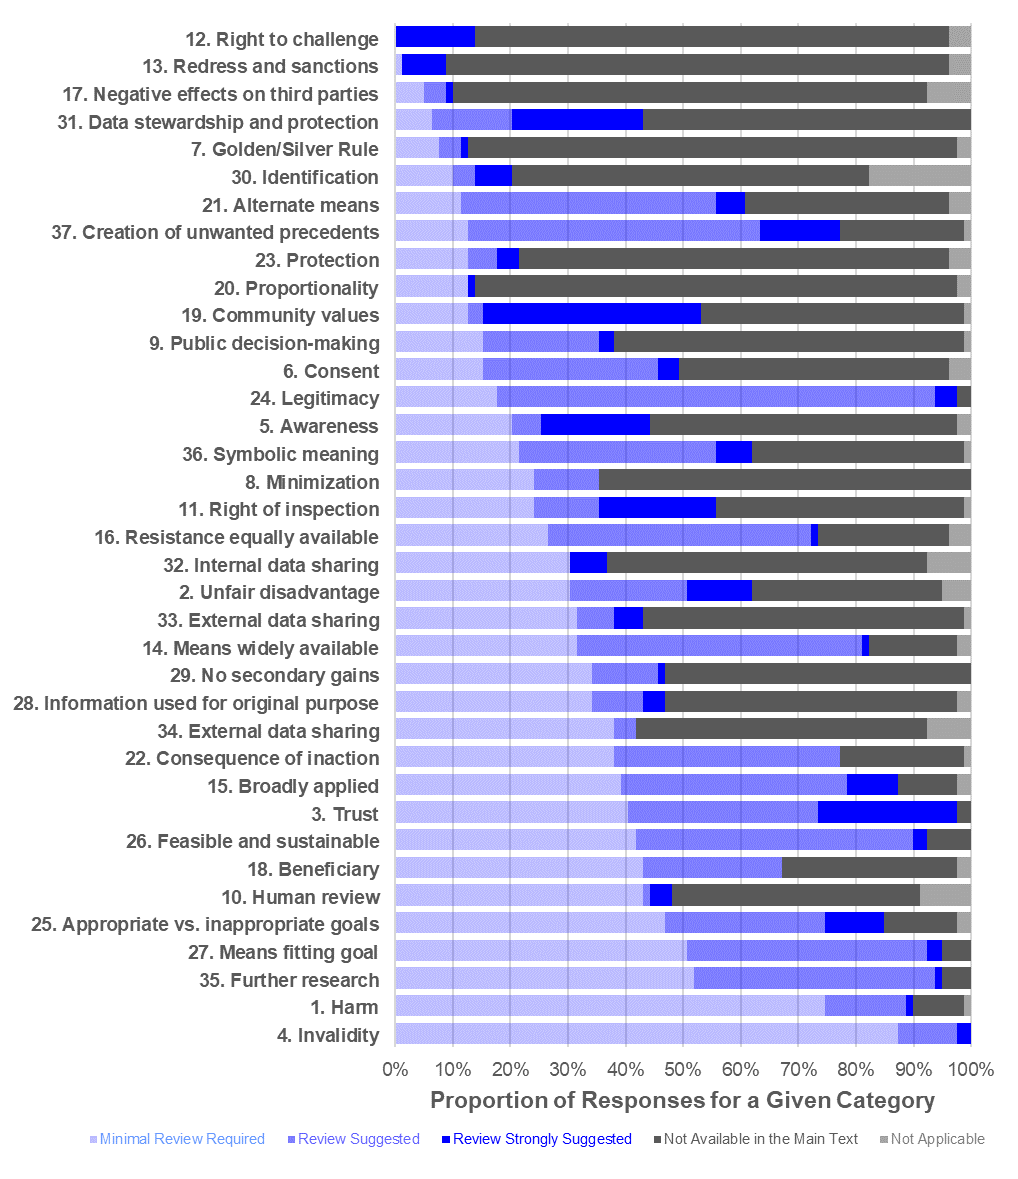


**Supplemental Figure 1.** The distribution of assigned flags (“minimal review required”, “review suggested”, “review strongly suggested”, “not available in the main text”, “not applicable”) for each structured ethical review category represented as a fraction percent of all publications analyzed (n=53) with multiple reviewers providing reports for select individual studies, resulting in more reviews than studies (n=79) 1,33–37,40–89. The categories are sorted by ascending proportion of “mnimal review required”.
